# Supplementary material for: ‘Unfocused groups’: lessons learnt amid remote focus groups in the Philippines
Source: Fam Med Community Health. 2021 Aug 4;9(Suppl 1):e001098. doi: 10.1136/fmch-2021-001098 (PMC8349646; doi:10.1136/fmch-2021-001098)
Supplement: Supplementary data [file fmch-2021-001098supp001.pdf]

## Supplementary Material

| Supplementary Table 1. 'FB Messenger Room' and Zoom Built-in Features |                                                                                                                                                                                                                                                                                          |                                                                                                                                                                                                                                             |
|-----------------------------------------------------------------------|------------------------------------------------------------------------------------------------------------------------------------------------------------------------------------------------------------------------------------------------------------------------------------------|---------------------------------------------------------------------------------------------------------------------------------------------------------------------------------------------------------------------------------------------|
|                                                                       | FB Messenger Room                                                                                                                                                                                                                                                                        | Zoom                                                                                                                                                                                                                                        |
| <b>Built-in Features</b>                                              |                                                                                                                                                                                                                                                                                          |                                                                                                                                                                                                                                             |
| <b>Video</b>                                                          | Participant is in full control of video                                                                                                                                                                                                                                                  | Participant is in full control; host can turn it off                                                                                                                                                                                        |
| <b>Speaker/Microphone</b>                                             | Host can mute all participants, only participants can unmute themselves                                                                                                                                                                                                                  | Host can mute participants, only participants can unmute themselves                                                                                                                                                                         |
| <b>Data Usage</b>                                                     | Approx. 300 mb per hour †                                                                                                                                                                                                                                                                | Approx. 810 mb per hour ††                                                                                                                                                                                                                  |
| <b>Subscription and Fees</b>                                          | Free                                                                                                                                                                                                                                                                                     | Free for users, but paid plan required for FGD host in case the duration should exceed 40 minutes                                                                                                                                           |
| <b>Privacy and Security</b>                                           |                                                                                                                                                                                                                                                                                          |                                                                                                                                                                                                                                             |
| <b>Logging-in</b>                                                     | Anyone given the link to the room (with and without FB Messenger account) ** can join the room                                                                                                                                                                                           | Anyone given the link/Meeting ID and Password (with and without Zoom account) can join the room                                                                                                                                             |
| <b>Anonymity of participants</b>                                      | No option to change username as participants use their FB/FB Messenger accounts to log in. Users without an account (or who wish to remain anonymous) can 'log-in as guest' and can choose a new username for the discussion<br>Everyone can see the list of participants in the meeting | Participants can change their Caller ID prior to logging-in. Host can rename participants and can disable or enable the participants from changing their Caller ID<br>Everyone can see the list of participants in the meeting              |
| <b>Removing Participants</b>                                          | The host can remove (uninvited) participants, even after the meeting has started<br>The meeting can be locked to prevent new participants (invited or not) from entering<br>Participants can invite other people to join                                                                 | The host can remove (uninvited) participants, even after the meeting has started<br>The meeting can be locked to prevent new participants (invited or not) from entering<br>Participants can invite other people to join                    |
| <b>Meeting Capacity</b>                                               | Maximum of 50 participants                                                                                                                                                                                                                                                               | Maximum of 100 participants                                                                                                                                                                                                                 |
| <b>Time Limit</b>                                                     | No time limit                                                                                                                                                                                                                                                                            | Time limit of 40 minutes for group sessions, no time limit with paid plans†*                                                                                                                                                                |
| <b>Scheduling</b>                                                     | Meetings can be scheduled ahead of time                                                                                                                                                                                                                                                  | Meetings can be scheduled ahead of time                                                                                                                                                                                                     |
| <b>Compatibility</b>                                                  | Android, PC, Apple, Mac<br>Can be accessed via internet browser, FB or Messenger software, or mobile application<br>Internet speed should be a minimum of 500kbps, and 1.5mbps for an HD quality video †*†                                                                               | Android, PC, Apple, Mac<br>Can be accessed via internet browser (mobile web browsers are not supported) [40], or Zoom software/mobile application<br>Internet speed should be a minimum of 500kbps, and 1.5mbps for an HD quality video †*† |
| <b>In-Meeting Chats***</b>                                            |                                                                                                                                                                                                                                                                                          |                                                                                                                                                                                                                                             |
| <b>Group Messaging</b>                                                | The host can only disable in-meeting chats when in mobile mode                                                                                                                                                                                                                           | The host can disable in-meeting chats                                                                                                                                                                                                       |
| <b>Private Messaging</b>                                              | No private messaging available                                                                                                                                                                                                                                                           | Private messaging is available, but can be disabled by the host                                                                                                                                                                             |
| <b>Recording</b>                                                      | No recording option available                                                                                                                                                                                                                                                            | Recording option available. The host can record the session and enable the participants to record                                                                                                                                           |
| <b>Screen Sharing</b>                                                 | Screen sharing is available both in Mobile and in PC mode                                                                                                                                                                                                                                | Screen sharing is available both in Mobile and in PC mode                                                                                                                                                                                   |

†We confirmed the data usage consumption based on our conducted FGDs. Additionally, we refer to: <https://www.apps2data.com/insights/how-much-mobile-data-does-video-calling-use/>

††<https://www.reviews.org/internet-service/how-much-data-does-zoom-use/>

\*\*Opening the link via a private browser works and allows the user to choose a different username or alias once entering the room, thereby bolstering privacy and confidentiality.

†\*Limited time for Zoom free subscription. Unlimited meeting duration for paid plans.

†\*†[https://support.zoom.us/hc/en-us/articles/201362023-System-requirements-for-Windows-macOS-and-](https://support.zoom.us/hc/en-us/articles/201362023-System-requirements-for-Windows-macOS-and-Linux#:~:text=Bandwidth%20requirements,The%20bandwidth%20used&text=For%201%3A1%20video%20calling,1.8Mbps%20(up%2Fdown)

[Linux#:~:text=Bandwidth%20requirements,The%20bandwidth%20used&text=For%201%3A1%20video%20calling,1.8Mbps%20\(up%2Fdown](https://support.zoom.us/hc/en-us/articles/201362023-System-requirements-for-Windows-macOS-and-Linux#:~:text=Bandwidth%20requirements,The%20bandwidth%20used&text=For%201%3A1%20video%20calling,1.8Mbps%20(up%2Fdown)

<https://www.bandwidthplace.com/internet-speed-facebook-chat-whats-ideal-article/#:~:text=A%20slow%20Internet%20connection%20can,a%20variant%20of%20Skype%20traffic>

\*\*\*In-meeting group chat is available in previous versions of the FB Messenger.
